# Supplementary material for: Correlation of Volatile Compounds and Sensory Attributes of Chinese Traditional Sweet Fermented Flour Pastes Using Hierarchical Cluster Analysis and Partial Least Squares-Discriminant Analysis
Source: Hindawi journal article supplement (doi:10.1155/2017/3213492), 2017-01-01
Supplement: f1 [file 3213492.f1.doc]

Table S1 Concentration of volatile compounds of seven SFFPs by GC-MS (means (n =2), μg/g)

|  | RT(min) | Compounds | Kovats index | Source♯ | DFS† | HJ† | LEEJ† | LEEH† | LS† | PS† | XH6† |
| --- | --- | --- | --- | --- | --- | --- | --- | --- | --- | --- | --- |
| 1 | 1.592 | acetic acid | 600 | AB | 0.257 | 0.112 | 1.169 | n.d. | 0.042 | 0.040 | 0.042 |
| 2 | 1.73 | ethyl acetate | 628 | AB | n.d. | 0.090 | 0.614 | 0.180 | n.d. | n.d. | n.d. |
| 3 | 1.785 | amyl acetate | 641 | B | n.d. | n.d. | n.d. | n.d. | 0.014 | n.d. | 0.014 |
| 4 | 1.858 | 2-amino-2-methyl-1,3-propanediol | 659 | B | n.d. | n.d. | 0.072 | 0.030 | n.d. | n.d. | n.d. |
| 5 | 1.883 | propanoic acid | 668 | AB | 0.090 | 0.014 | 0.029 | n.d. | 0.005 | 0.003 | 0.005 |
| 6 | 2.136 | isovaleraldehyde | 702 | B | n.d. | 0.044 | 0.900 | 0.185 | 0.099 | 0.041 | 0.099 |
| 7 | 2.275 | 2-methylbutyraldehyde | 710 | B | 0.189 | 0.077 | 1.412 | 0.284 | 0.132 | 0.106 | 0.132 |
| 8 | 3.525 | isoamyl alcohol | 755 | B | 0.852 | n.d. | 1.167 | 0.493 | 0.108 | 0.047 | 0.108 |
| 9 | 3.617 | 2-methyl-1-butanol | 760 | B | 0.563 | 0.181 | n.d. | 0.309 | 0.087 | 0.042 | 0.087 |
| 10 | 4.271 | toluene | 773 | AB | n.d. | n.d. | 0.719 | n.d. | n.d. | n.d. | 0.012 |
| 11 | 4.917 | butyl propionate | 784 | B | 0.005 | 0.146 | n.d. | n.d. | n.d. | n.d. | n.d. |
| 12 | 5.225 | diisobutyl phthalate | 795 | B | 0.135 | 0.176 | n.d. | n.d. | n.d. | n.d. | n.d. |
| 13 | 5.426 | caproaldehyde | 801 | B | n.d. | n.d. | 0.065 | 0.040 | 0.005 | n.d. | 0.005 |
| 14 | 5.486 | ethyl butyrate | 804 | AB | n.d. | 0.103 | 0.083 | n.d. | n.d. | n.d. | n.d. |
| 15 | 5.975 | n-butyl acetate | 816 | B | 0.043 | n.d. | 1.826 | 0.212 | 0.040 | n.d. | 0.040 |
| 16 | 6.439 | furfural | 829 | AB | n.d. | 0.324 | 0.396 | 0.145 | 0.199 | 0.313 | 0.199 |
| 17 | 7.123 | isovaleric acid | 877 | AB | n.d. | n.d. | 0.078 | 0.057 | n.d. | 0.007 | n.d. |
| 18 | 7.214 | ethyl 2-methylbutyrate | 879 | B | n.d. | 0.105 | 0.089 | n.d. | 0.042 | n.d. | n.d. |
| 19 | 7.333 | 3-furanmethanol | 883 | B | 0.520 | 0.049 | n.d. | n.d. | n.d. | n.d. | n.d. |
| 20 | 7.398 | butanoic acid | 885 | B | n.d. | 0.159 | 0.255 | n.d. | n.d. | n.d. | n.d. |
| 21 | 7.467 | 2-methylbutanoic acid | 890 | B | n.d. | n.d. | n.d. | n.d. | n.d. | 0.011 | 0.042 |
| 22 | 8.136 | 2-ketoglutaric acid | 894 | B | n.d. | 0.655 | 0.272 | n.d. | 0.009 | 0.018 | 0.009 |
| 23 | 8.253 | isoamyl acetate | 876 | B | n.d. | 0.042 | 0.087 | n.d. | n.d. | 0.002 | n.d. |
| 24 | 8.742 | cyclohexanone | 907 | B | 0.030 | n.d. | n.d. | 0.047 | n.d. | 0.004 | n.d. |
| 25 | 8.964 | butyl acrylate | 916 | B | n.d. | n.d. | 0.366 | 0.046 | 0.016 | n.d. | 0.016 |
| 26 | 9.281 | 2-acetylfuran | 920 | B | n.d. | 0.098 | 0.805 | 0.194 | n.d. | 0.027 | n.d. |
| 27 | 9.283 | 3-(methylthio)propionaldehyde | 925 | B | 0.202 | n.d. | n.d. | n.d. | 0.078 | n.d. | 0.078 |
| 28 | 9.735 | 4-ketopimelic acid | 934 | B | n.d. | 0.027 | n.d. | n.d. | n.d. | n.d. | n.d. |
| 29 | 10.99 | (5-methyl-2-furyl)methanol | 948 | B | 0.029 | n.d. | 0.263 | 0.041 | n.d. | n.d. | n.d. |
| 30 | 11.01 | 4-methylpentanoic acid | 949 | B | n.d. | n.d. | n.d. | n.d. | 0.013 | 0.003 | 0.013 |
| 31 | 11.23 | 5-methyl furfural | 952 | B | n.d. | 0.114 | 3.359 | n.d. | n.d. | 0.13 | n.d. |
| 32 | 11.24 | benzaldehyde | 960 | AB | 0.215 | n.d. | n.d. | 0.577 | 0.183 | n.d. | 0.183 |
| 33 | 11.55 | ethyl caproate | 963 | B | n.d. | 0.046 | n.d. | n.d. | n.d. | n.d. | n.d. |
| 34 | 11.92 | 3-methylthiopropanol | 972 | B | 0.953 | 0.914 | 0.218 | n.d. | 0.085 | n.d. | 0.085 |
| 35 | 12.06 | 1-octen-3-ol | 981 | B | n.d. | n.d. | 0.700 | 0.155 | 0.031 | n.d. | 0.031 |
| 36 | 12.12 | 3-buten-2-ol | 984 | B | 0.031 | n.d. | 0.064 | n.d. | n.d. | n.d. | n.d. |
| 37 | 12.22 | 6-methyl-5-hepten | 986 | B | 0.009 | n.d. | n.d. | n.d. | 0.004 | n.d. | n.d. |
| 38 | 12.57 | hexanoic acid | 990 | B | 0.160 | n.d. | n.d. | n.d. | n.d. | 0.009 | n.d. |
| 39 | 12.67 | butyl butanoate | 997 | B | n.d. | n.d. | 0.061 | n.d. | 0.005 | n.d. | 0.005 |
| 40 | 12.7 | trimethyl-pyrazine | 1000 | AB | n.d. | 0.095 | n.d. | n.d. | n.d. | n.d. | n.d. |
| 41 | 12.76 | ethyl caproate | 1009 | B | n.d. | 0.324 | 0.443 | n.d. | 0.006 | n.d. | 0.006 |
| 42 | 12.89 | ethlbenaldehyde | 1011 | B | n.d. | n.d. | n.d. | n.d. | 0.041 | n.d. | 0.041 |
| 43 | 12.90 | hexyl acrylate | 1012 | B | 0.038 | n.d. | 0.233 | n.d. | n.d. | n.d. | n.d. |
| 44 | 13.07 | 1H-pyrrole-2-carbaldehyde | 1014 | B | 0.025 | 0.016 | 0.085 | 0.077 | 0.005 | 0.002 | 0.005 |
| 45 | 13.19 | alpha-ketoglutaric acid | 1018 | B | 0.017 | 0.041 | 0.104 | n.d. | n.d. | 0.002 | n.d. |
| 46 | 13.60 | 2,5-diethyltetrahydrofuran | 1024 | B | n.d. | n.d. | 0.036 | n.d. | n.d. | 0.010 | n.d. |
| 47 | 13.73 | 1-methyl-4-(1-methylethenyl)- cyclohexanol | 1025 | B | 0.242 | n.d. | 0.174 | 4.507 | n.d. | n.d. | n.d. |
| 48 | 13.80 | 1-(5-methyl-2-furanyl)- ethanone | 1029 | B | n.d. | 0.010 | 0.232 | n.d. | n.d. | n.d. | n.d. |
| 49 | 13.83 | 1,8-cineole | 1030 | AB | 0.029 | n.d. | n.d. | n.d. | n.d. | 0.017 | n.d. |
| 50 | 13.89 | 1,2-ethanediol | 1031 | B | 0.016 | 0.060 | 0.043 | n.d. | n.d. | n.d. | n.d. |
| 51 | 14.22 | phenylacetaldehyde | 1040 | B | 1.282 | 0.261 | 2.222 | 1.425 | 0.422 | 0.075 | 0.422 |
| 52 | 14.78 | 2-propenoic acid | 1043 | B | 0.231 | 0.067 | n.d. | n.d. | n.d. | n.d. | n.d. |
| 53 | 14.87 | 2-acetylpyrrole | 1045 | AB | 1.300 | 0.184 | 1.983 | 1.555 | 0.158 | 0.082 | 0.158 |
| 54 | 15.34 | 3,5-dimethyl-2-ethylpyrazine | 1068 | B | n.d. | n.d. | 0.734 | 1.942 | n.d. | n.d. | n.d. |
| 55 | 15.47 | sorbic acid | 1089 | B | 1.144 | n.d. | 6.677 | 1.674 | 0.032 | 0.165 | 0.032 |
| 56 | 16.22 | linalool | 1100 | AB | 14.360 | 0.059 | 11.870 | 26.940 | 0.316 | 0.244 | 0.316 |
| 57 | 16.30 | isodihydrolavandulal | 1102 | B | n.d. | 0.088 | n.d. | n.d. | 0.028 | 0.272 | 0.255 |
| 58 | 16.39 | nonyl aldehyde | 1105 | B | 5.272 | n.d. | n.d. | n.d. | 0.136 | n.d. | 0.136 |
| 59 | 16.57 | phenethyl alcohol | 1126 | B | 23.180 | 0.879 | n.d. | n.d. | 0.134 | 0.139 | 0.134 |
| 60 | 16.63 | isodihydrolavandulal | 1127 | B | n.d. | 0.008 | n.d. | n.d. | 0.255 | 0.009 | n.d. |
| 61 | 16.76 | 3-thujanone | 1129 | B | n.d. | n.d. | n.d. | n.d. | 0.014 | n.d. | 0.014 |
| 62 | 16.77 | thujone | 1130 | B | 0.018 | n.d. | n.d. | 0.271 | n.d. | n.d. | n.d. |
| 63 | 17.07 | N-methylpyrrole-2-carboxaldehyde | 1134 | B | 0.075 | 0.044 | 0.142 | n.d. | 0.009 | 0.013 | n.d. |
| 64 | 17.25 | butanoic acid | 1135 | B | 0.090 | 0.098 | 0.049 | n.d. | 0.092 | 0.045 | 0.092 |
| 65 | 18.14 | trans-2-nonenal | 1147 | AB | n.d. | n.d. | n.d. | 0.063 | n.d. | n.d. | 0.010 |
| 66 | 18.26 | amyl-2-methylbutyrate | 1149 | B | n.d. | 0.058 | 1.515 | n.d. | n.d. | 0.008 | n.d. |
| 67 | 18.46 | ethyl benzoate | 1155 | B | 0.041 | 0.476 | 1.289 | 0.836 | 0.020 | 0.132 | 0.020 |
| 68 | 18.6 | methyl-α-toluate | 1162 | B | n.d. | 0.024 | n.d. | n.d. | 0.007 | n.d. | 0.007 |
| 69 | 18.78 | diethyl succinate | 1167 | AB | 0.299 | 0.095 | 0.057 | n.d. | n.d. | n.d. | n.d. |
| 70 | 19.05 | 1-phenylethyl acetate | 1183 | B | n.d. | n.d. | n.d. | n.d. | 0.012 | n.d. | 0.012 |
| 71 | 19.25 | 4-menth-1-en-8-ol | 1200 | B | n.d. | n.d. | n.d. | n.d. | 0.036 | n.d. | 0.036 |
| 72 | 19.33 | ethyl caprylate | 1209 | B | 0.032 | 0.057 | 0.278 | 0.045 | 0.006 | n.d. | 0.006 |
| 73 | 19.63 | decyl aldehyde | 1216 | B | 0.081 | n.d. | 0.342 | 0.505 | 0.025 | 0.005 | 0.025 |
| 74 | 20.68 | ethyl phenylacetate | 1252 | AB | 0.295 | 0.838 | 0.508 | 0.368 | 0.017 | 0.002 | 0.017 |
| 75 | 21.45 | 2-phenyl-2-butenal | 1295 | B | 0.592 | 0.191 | 0.457 | 0.276 | 0.138 | 0.042 | 0.138 |
| 76 | 21.60 | 2-methyl-3-phenyl-2-propen-1-ol | 1299 | B | 0.056 | n.d. | 1.160 | n.d. | n.d. | n.d. | n.d. |
| 77 | 22.23 | 2-methylnaphth | 1374 | B | 0.027 | 0.109 | 0.047 | 0.063 | 0.013 | n.d. | n.d. |
| 78 | 23.37 | 4-hydroxyanisole | 1406 | B | 0.019 | n.d. | 0.087 | n.d. | n.d. | n.d. | n.d. |
| 79 | 24.06 | gamma-nonanolactone | 1510 | B | n.d. | n.d. | n.d. | 0.085 | 0.009 | n.d. | 0.009 |
| 80 | 24.08 | dihydro-5-propyl-pentenal | 1511 | B | 0.075 | 0.039 | n.d. | n.d. | n.d. | 0.004 | n.d. |
| 81 | 24.27 | 4-methyl-2-phenyl-2-pentenal | 1519 | B | 0.108 | 0.233 | n.d. | n.d. | 0.279 | 0.049 | n.d. |
| 82 | 24.45 | butyl isobutyrate | 1558 | B | 0.058 | n.d. | n.d. | n.d. | n.d. | n.d. | 0.006 |
| 83 | 25.11 | ethyl caprate | 1685 | B | 0.052 | 0.013 | 0.112 | n.d. | n.d. | n.d. | n.d. |
| 84 | 25.52 | (+)-longifolene | 1702 | B | n.d. | n.d. | n.d. | 0.947 | 0.092 | n.d. | 0.092 |
| 85 | 26.46 | 1,2-benzenedicarboxylic acid dimethyl ester | 1717 | B | 0.063 | n.d. | 0.102 | n.d. | n.d. | 0.006 | n.d. |
| 86 | 26.73 | cocal | 1733 | B | 0.083 | 0.208 | 0.059 | 0.233 | 0.419 | 0.073 | 0.419 |
| 87 | 27.47 | amyl cinnamal | 1749 | B | 0.777 | n.d. | 0.875 | n.d. | 1.403 | 0.328 | 1.403 |
| 88 | 28.50 | methyl tridecanoate | 1766 | B | n.d. | 0.012 | n.d. | n.d. | n.d. | 0.002 | n.d. |
| 89 | 28.61 | 2-[1-phenyl-meth-(E)-ylidene]-octanal | 1770 | B | n.d. | 0.020 | n.d. | n.d. | 0.010 | n.d. | 0.042 |
| 90 | 29.92 | diethyl phthalate | 1786 | B | 0.664 | 0.097 | 1.498 | n.d. | 0.426 | n.d. | 0.426 |
| 91 | 30.08 | ethyl dodecanoate | 1795 | B | 0.104 | 0.063 | n.d. | n.d. | n.d. | n.d. | n.d. |
| 92 | 32.83 | ethyl myristate | 1980 | B | 0.112 | 0.012 | 0.129 | 0.052 | n.d. | n.d. | n.d. |
| 93 | 33.58 | ethyl linoleate | 2100 | B | 0.991 | 0.054 | 8.020 | n.d. | n.d. | n.d. | n.d. |
| 94 | 33.73 | ethyl oleate | 2108 | B | 0.568 | 0.089 | 3.846 | n.d. | n.d. | n.d. | n.d. |
| 95 | 33.93 | ethyl myristate | 2117 | B | 0.056 | 0.017 | n.d. | n.d. | n.d. | n.d. | n.d. |
| 96 | 34.69 | 1,2-benzenedicarboxylic acid dibutyl ester | 2204 | B | 0.355 | 0.065 | 0.990 | 3.282 | 0.206 | 0.044 | 0.206 |

♯ Each compound was separated with a DB-5MS column (30 m × 0.25 mm i.d., 0.25 μm film thickness) and identified by comparing it with an authentic standard based on the following criteria: (A) matching retention time on the same column from http://www.flavornet.org, (B) mass spectrum using the NIST and WILEY library.

†Values expressed as phenethyl acetate equivalent (5μg/mL) and given means (n =2);

n.d., not detected.
